# Supplementary material for: Production of beams of multicharged ions of metals with huge pulses of a ruby laser.
Source: Atypon-hosted journal article supplement (doi:10.1176/appi.ajp.2019.18101191), 1972-01-01
Supplement: ajp_18101191_correction01.pdf [file ajp_18101191_correction01.pdf]

## **Correction to Hurd et al.**

When the article “Cannabidiol for the Reduction of Cue-Induced Craving and Anxiety in Drug-Abstinent Individuals With Heroin Use Disorder: A Double-Blind Randomized Placebo-Controlled Trial,” by Yasmin L. Hurd, Ph.D., et al. (doi: 10.1176/appi.ajp.2019.18101191) was published online on May 21, 2019 and subsequently appeared as part of the November 2019 issue, there was an error in the adverse events reported in Table S4 of the data supplement. For Test Session 2 (Day 2), there were two “tired/fatigue” reports in the placebo group and none in the 800 mg cannabidiol group; also for Test Session 2 (Day 2), it should have been noted that one person accounted for the events reported in the 400 mg group. The data supplement was replaced with these changes incorporated on June 9, 2020.
